# Supplementary material for: A New Polyoxygenated Flavonol Gossypetin-3-O-β-d-Robinobioside from Caesalpinia gilliesii (Hook.) D. Dietr. and In Vivo Hepatoprotective, Anti-Inflammatory, and Anti-Ulcer Activities of the Leaf Methanol Extract
Source: PubMed Central journal article supplement (PMC6337366; doi:10.3390/molecules24010138), 2018-12-31
Supplement: molecules-24-00138-s001.pdf [file molecules-24-00138-s001.pdf]

# A New Polyoxygenated Flavonol Gossypetin-3-O- $\beta$ -D-Robinoside from *Caesalpinia gilliesii* (Hook.) and In Vivo Hepatoprotective, Anti-Inflammatory, and Anti-Ulcer Activities of the Leaf Methanol Extract

Mahmoud Emam,<sup>1</sup> Mohamed A. El Raey,<sup>1,\*</sup> Alaadin E. El- Haddad,<sup>2</sup> Sally A. El Awdan,<sup>3</sup> Abdel-Gawad M. Rabie,<sup>4</sup> Mohamed A. El-Ansari,<sup>1</sup> Mansour Sobeh,<sup>5</sup> Samir M. Osman,<sup>2,\*</sup> and Michael Wink<sup>5,\*</sup>

<sup>1</sup> Department of Phytochemistry and Plant Systematics, National Research Centre, Dokki, Cairo 12622, Egypt; mahmoudemamhegazy2020@gmail.com (M.E.); ansarialaa@hotmail.com (M.A.E.-A.)

<sup>2</sup> Department of Pharmacognosy, Faculty of Pharmacy, October 6 University, Cairo 12566, Egypt; Haddad002@yahoo.com (A.E.E.H.)

<sup>3</sup> Department of Pharmacology, National Research Centre, Dokki, Cairo 12622, Egypt; sallyelawdan@ymail.com

<sup>4</sup> Department of Chemistry, Faculty of Science, Ain Shams University, Abbassia, Cairo 11566, Egypt; Mohamed.abdelgawad@hotmail.com

<sup>5</sup> Department of Pharmaceutical Biology, Institute of Pharmacy and Molecular Biotechnology, Heidelberg University, Im Neuenheimer Feld 364, 69120 Heidelberg, Germany; sobeh@uni-heidelberg.de

\* Corresponding authors: E-mails: [ma.aziz@nrc.sci.eg](mailto:ma.aziz@nrc.sci.eg) (M.A.E.R.), [samirosman@o6u.edu.eg](mailto:samirosman@o6u.edu.eg) (S.M.O.), [wink@uni-heidelberg.de](mailto:wink@uni-heidelberg.de) (M.W.); Tel.: + 49 62 21 - 54 48 80 (M.W.)

## NMR data of the identified compounds

**Quercetin (1):** A yellow powder (26 mg) (UV  $\lambda_{\max}$ =256, 368 nm).  $^1\text{H-NMR}$  (500 MHz,  $\text{DMSO-}d_6$ ):  $\delta$  12.48 (1H, s, 5-OH), 7.67 (1H, d,  $J$ =2.1Hz, H-2'), 7.54 (1H, dd,  $J$ =8.5, 2.2Hz, H-6'), 6.88 (1H, d,  $J$ =8.5Hz, H-5'), 6.40 (1H, d,  $J$ =2Hz, H-8), 6.18 (1H, d,  $J$ =2Hz, H-6). APT-NMR(125 MHz,  $\text{DMSO-}d_6$ ):  $\delta$  146.7 (C-2), 135.6 (C-3), 175.8 (C-4), 160.7 (C-5), 98.1 (C-6), 163.9 (C-7), 93.3 (C-8), 156.1 (C-9), 102.9 (C-10), 121.9 (C-1'), 115.0 (C-2'), 145.0 (C-3'), 147.6 (C-4'), 115.6 (C-5'), 119.9 (C-6'). ESI-MS  $m/z$ =301 [M-H]<sup>-</sup>.

**Quercetin-3-O- $\beta$ -D-glucoside (2):** A yellow powder (37 mg) (UV  $\lambda_{\max}$ =255, 356 nm).  $^1\text{H-NMR}$  (500 MHz,  $\text{DMSO-}d_6$ ):  $\delta$  7.59 (H, d, H-2'), 7.56 (1H, dd,  $J$ =2.0, 7.3 Hz, H-6'), 6.85 (1H, d,  $J$ =8.4 Hz, H-5'), 6.39 (1H, s, H-8), 6.19 (1H, s, H-6), 5.45 (1H, d,  $J$ =7.3 Hz, H-1''). APT-NMR(125 MHz,  $\text{DMSO-}d_6$ ):  $\delta$  156.1 (C-2), 133.3 (C-3), 177.4 (C-4), 161.2 (C-5), 99.0 (C-6), 165.3 (C-7), 93.7 (C-8), 156.5 (C-9), 103.6 (C-10), 121.1 (C-1'), 115.3 (C-2'), 144.9 (C-3'), 148.7 (C-4'), 116.3 (C-5'), 121.6 (C-6'), 101.1 (C-1''), 74.2 (C-2''), 76.6 (C-3''), 69.9 (C-4''), 77.6 (C-5''), 61.0 (C-6''). ESI-MS  $m/z$ =463 [M-H]<sup>-</sup>.

**Quercetin-3-O- $\beta$ -D-galactoside (3):** A yellow powder (30 mg) (UV  $\lambda_{\max}$ =256, 355 nm).  $^1\text{H-NMR}$  (500 MHz,  $\text{DMSO-}d_6$ ):  $\delta$  7.66 (1H, dd,  $J$ =8.5, 2.0 Hz, H-6'), 7.58 (1H, d,  $J$ =2.0Hz, H-2'), 6.83 (1H, d,  $J$ =8.5 Hz, H-5'), 6.39 (1H, s, H-8), 6.19 (1H, s, H-6), 5.37 (1H, d,  $J$ =7.4 Hz, H-1'''). APT-NMR(125 MHz,  $\text{DMSO-}d_6$ ):  $\delta$  156.2 (C-2), 133.5 (C-3), 177.3 (C-4), 161.1 (C-5), 99.0 (C-6), 165.4 (C-7), 93.3 (C-8), 156.4 (C-9), 103.5 (C-10), 121.0 (C-1'), 115.3 (C-2'), 144.9 (C-3'), 148.5 (C-4'), 116.0 (C-5'), 121.9 (C-6'), 102.0 (C-1''), 71.3 (C-2''), 73.3 (C-3''), 67.9 (C-4''), 75.9 (C-5''), 60.2 (C-6''). ESI-MS  $m/z$ =463 [M-H]<sup>-</sup>.

**Quercetin-3-O- $\beta$ -D-rutinoside (Rutin) (4):** A light yellow powder (64 mg) (UV  $\lambda_{\max}$ =256, 354 nm).  $^1\text{H-NMR}$  (500 MHz,  $\text{DMSO-}d_6$ ):  $\delta$  7.55 (1H, d,  $J$ =2.1 HZ, H-2'), 7.53 (1H, dd,  $J$ =8.2&2.1Hz, H-6'), 6.83 (1H, d,  $J$ =8.2Hz, H-5'), 6.37 (1H, d,  $J$ =1.6Hz, H-8), 6.17 (1H, d,  $J$ =1.6Hz, H-6), 5.32 (1H, d,  $J$ =7.3Hz, H-1''), 4.38 (1H, d,  $J$ =1.2 Hz, H-1'''), 0.98 (3H, d,  $J$ =6.2Hz, H-6'''). APT-NMR (125 MHz,  $\text{DMSO-}d_6$ ):  $\delta$  156.44 (C-2), 133.21 (C-3), 177.10 (C-4), 161.10 (C-5), 98.93 (C-6), 165.02 (C-7), 93.71 (C-8), 156.44 (C-9), 103.55 (C-10), 120.98 (C-1'), 115.27 (C-2'), 144.83 (C-3'), 148.64 (C-4'), 116.16 (C-5'), 121.56 (C-6'), 101.31 (C-1''), 74.06 (C-2''), 76.46 (C-3''), 70.55 (C-4''), 75.85 (C-5''), 66.96 (C-6''), 100.74 (C-1'''), 70.33 (C-2'''), 69.96 (C-3'''), 71.85 (C-4'''), 68.22 (C-5'''), 17.74 (C-6'''). ESI-MS  $m/z$ =609 [M-H]<sup>-</sup>.

**Quercetin-3-O- $\beta$ -D-robinobioside(5):** A yellow powder (33 mg) (UV  $\lambda_{\max}$ =254, 353 nm).  $^1\text{H-NMR}$  (500 MHz,  $\text{DMSO-}d_6$ ):  $\delta$  7.65 (1H, dd,  $J$ =8.5&2.2Hz, H-6'), 7.53 (1H, d,  $J$ =2.2 HZ, H-2'), 6.82 (1H, d,  $J$ =8.5Hz, H-5'), 6.41 (1H, d,  $J$ =1.8Hz, H-8), 6.19 (1H, d,  $J$ =1.8Hz, H-6), 5.31 (1H, d,  $J$ =7.3Hz, H-1''), 4.42 (1H, d,  $J$ =1.2Hz, H-1'''), 1.06 (3H, d,  $J$ =6.2Hz, H-6'''); APT-NMR (DMSO- $d_6$ , 125 MHz):  $\delta$  156.38 (C-2), 133.47 (C-3), 177.38 (C-4), 161.16 (C-5), 98.71 (C-6), 164.23 (C-7), 93.56 (C-8), 156.32 (C-9), 103.85 (C-10), 121.03 (C-1'), 115.21 (C-2'), 144.82 (C-3'), 148.49 (C-4'), 115.98 (C-5'), 121.89 (C-6'), 102.02 (C-1''), 71.09 (C-2''), 73.07 (C-3''), 68.03 (C-4''), 73.55 (C-5''), 65.11 (C-6''), 100.00 (C-1'''), 70.62 (C-2'''), 70.41 (C-3'''), 71.93 (C-4'''), 68.26 (C-5'''), 17.92 (C-6'''). ESI-MS  $m/z$ =609 [M-H]<sup>-</sup>.

**Kaempferol-3-O- $\beta$ -D-rutinoside (6):** A yellow amorphous powder (42 mg) (UV  $\lambda_{\max}$ =265, 349 nm).  $^1\text{H-NMR}$  (500 MHz, DMSO- $d_6$ ):  $\delta$  12.53 (1H, s, 5-OH), 7.97 (2H, d,  $J$  = 8.8Hz, H-2', 6'), 6.87 (2H, d,  $J$ =8.8Hz, H-3', 5'), 6.37 (1H, d,  $J$ =1.6Hz, H-8), 6.16 (1H, d,  $J$ =1.6Hz, H-6), 5.29 (1H, d,  $J$ =7.5 Hz, H-1''), 4.38 (1H, br. s, H-1'''), 0.98 (3H, d,  $J$  = 6.1 Hz, H-6'''). APT-NMR (125 MHz, DMSO- $d_6$ ):  $\delta$  156.55 (C-2), 133.15 (C-3), 177.17 (C-4), 161.12 (C-5), 98.99 (C-6), 166.96 (C-7), 93.87 (C-8), 156.63 (C-9), 103.56 (C-10), 120.85 (C-1'), 130.81 (C-2', 6'), 115.08 (C-3', 5'), 159.91 (C-4'), 101.45 (C-1''), 74.17 (C-2''), 76.37 (C-3''), 70.58 (C-4''), 75.71 (C-5''), 67.40 (C-6''), 100.76 (C-1'''), 70.33 (C-2'''), 69.89 (C-3'''), 71.81 (C-4'''), 68.24 (C-5'''), 17.73 (C-6'''). ESI-MS  $m/z$ =593 [M-H] $^-$ .

**Luteolin (7):** A yellow powder (23 mg) (UV  $\lambda_{\max}$ =267, 349 nm).  $^1\text{H-NMR}$  (500 MHz, DMSO- $d_6$ ):  $\delta$  12.98 (s, 5-OH), 7.42 (1H, dd,  $J$ =1.8, 8.3Hz, H-6'), 7.39 (1H, d,  $J$ =1.8Hz, H-2'), 6.88 (1H, d,  $J$ =8.3Hz, H-5'), 6.68 (1H, s, H-3), 6.44 (1H, d,  $J$ =2.0Hz, H-8), 6.19 (1H, d,  $J$ =2.0Hz, H-6). ESI-MS  $m/z$ = 285 [M-H] $^-$ .

**Luteolin-7-O- $\beta$ -D-glucoside (8):** A yellow powder (27 mg) (UV  $\lambda_{\max}$ =255, 268 sh, 348 nm).  $^1\text{H-NMR}$  (500 MHz, DMSO- $d_6$ ):  $\delta$  7.45(1H, dd,  $J$ =2.0,8.2Hz, H-6'), 7.43(1H, d, 2Hz, H-2'), 6.91 (1H, d,  $J$ =8.2Hz, H-5'), 6.79 (1H, d,  $J$ =2.2Hz, H-8), 6.74 (1H, s, H-3), 6.44 (1H, d,  $J$ =2.2Hz, H-6), 5.07 (1H, d,  $J$  = 7.5 Hz, H-1''). APT-NMR (125 MHz, DMSO- $d_6$ ):  $\delta$  164.6 (C-2), 103.5 (C-3), 182.3 (C-4), 161.6 (C-5), 99.9 (C-6), 163.4 (C-7), 95.2 (C-8), 157.4 (C-9), 105.8 (C-10), 121.7 (C-1'), 114.0 (C-2'), 146.3 (C-3'), 150.5 (C-4'), 116.5 (C-5'), 119.6 (C-6'), 100.3 (C-1''), 73.6 (C-2''), 76.8 (C-3''), 70.0 (C-4''), 77.7 (C-5''), 61.0 (C-6''). ESI-MS  $m/z$ =447 [M-H] $^-$ .

**Isorhamnetin (9):** A yellow amorphous powder (17 mg) (UV  $\lambda_{\max}$ =255, 368 nm).  $^1\text{H-NMR}$  (300 MHz, CD $_3$ OD):  $\delta$  7.81 (1H, d,  $J$ =1.7Hz, H-2'), 7.68 (1H, dd,  $J$ =1.7, 8.4Hz, H-6'), 6.88(1H, d,  $J$ =8.4Hz, H-5'), 6.36 (1H, d,  $J$ =1.8Hz, H-8), 6.14 (1H, d,  $J$ =1.8 Hz, H-6), 3.89 (3H, s, H-3'). APT-NMR (75 MHz, DMSO- $d_6$ ):  $\delta$  146.60 (C-2), 135.78 (C-3), 175.85 (C-4), 160.62 (C-5), 98.18 (C-6), 163.65 (C-7), 93.58 (C-8), 156.09 (C-9), 103.01 (C-10), 121.95 (C-1'), 111.72 (C-2'), 148.79 (C-3'), 147.35 (C-4'), 115.53 (CH-5'), 121.70(C-6'), 55.77 (OCH3). ESI-MS  $m/z$ = 315 [M-H] $^-$ .

**Gossypetin-3-O- $\beta$ -D-rutinoside(10):** A yellow amorphous powder (23 mg) (UV  $\lambda_{\max}$ =262, 353 nm).  $^1\text{H NMR}$  (500 MHz, DMSO- $d_6$ ):  $\delta$  12.62 (1H,br s, 5-OH), 7.74 (1H, d,  $J$ =2.0Hz, H-2'), 7.65 (1H,dd,  $J$ =2&8.5Hz, H-6'), 6.81 (1H, d,  $J$ =8.5Hz, H-5'), 6.15 (1H, s, H-6), 5.39 (1H, d,  $J$ =7.7Hz, H-1''), 4.43 (1H, br. s, H-1'''), 1.03 (3H, d,  $J$ =6.2Hz, H-6'''). APT-NMR (125 MHz, DMSO- $d_6$ ):  $\delta$  156.19 (C-2), 133.07 (C-3), 177.76 (C-4), 158.86 (C-5), 99.80 (C-6), 153.89 (C-7), 122.8 (C-8), 148.4 (C-9), 104.80 (C-10), 121.60 (C-1'), 115.20 (C-2'), 144.73 (C-3'), 148.40 (C-4'), 116.45 (C-5'), 121.63 (C-6'), 101.54 (C-1''), 74.16 (C-2''), 76.44 (C-3''), 70.00 (C-4''), 75.92 (C-5''), 67.00 (C-6''), 100.70 (C-1'''), 70.32 (C-2'''), 70.57 (C-3'''), 71.86 (C-4'''), 68.29 (C-5'''), 17.78 (C-6'''). ESI-MS  $m/z$ =625 [M-H] $^-$ .

**Gossypetin-3-O- $\beta$ -D-robinobioside [rhamnosyl (1 $\rightarrow$ 6) galactoside] (11):** A yellow amorphous powder (22 mg) (UV  $\lambda_{\max}$ =261, 352 nm).  $^1\text{H NMR}$  (500 MHz, DMSO- $d_6$ ):  $\delta$  12.62 (1H, br.s, 5-OH), 7.75 (1H, d,  $J$ =2.0Hz, H-2'), 7.67 (1H, dd,  $J$ =2&8.5Hz, H-6'), 6.79 (1H, d,  $J$ =8.5Hz, H-5'), 6.14 (1H, s, H-6), 5.35 (1H, d,  $J$ =7.7Hz, H-1''), 4.45 (1H, br.s, H-1'''), 1.08 (3H, d,  $J$ =6.2Hz, H-6''').  $^{13}\text{C}$  APT-NMR (125.721 MHz, DMSO- $d_6$ ):  $\delta$  156.16 (C-2), 133.09 (C-3), 177.73 (C-4), 158.83 (C-5), 98.39 (C-6), 153.84 (C-7), 122.6 (C-8), 148.5 (C-9), 103.50 (C-10), 121.50 (C-1'), 115.10 (C-2'), 144.78 (C-3'), 148.50 (C-4'), 116.2 (C-5'), 121.65 (C-6'), 102.36 (C-1''), 71.20 (C-2''), 73.09 (C-3''), 67.95 (C-4''), 73.32 (C-5''), 64.79 (C-6''), 100.43 (C-1'''), 70.63 (C-2'''), 70.41 (C-3'''), 71.92 (C-4'''), 68.31 (C-5'''), 17.94 (C-6'''). ESI-MS/MS  $m/z$  = 625 [M-H] $^-$ , and different fragments at  $m/z$  317 [M-H-rhamnohexose] $^-$ , 457 [M-H-rhamnohexose - (1,3 A $_o$ -B $_o$ )] $^-$  and 489 [M-H- (0,2 A $^+$ -B $^+$ )] $^-$ .

***p*-Hydroxybenzoic acid (12):** Off-white solid (21 mg) (UV  $\lambda_{\max}$ =252 nm).  $^1\text{H}$ -NMR (500 MHz,  $\text{DMSO-}d_6$ ):  $\delta$  7.9 (d,  $J$ =8.5Hz, H-2,6), 6.8 (d,  $J$ =8.5Hz, H-3,5). APT-NMR (125 MHz,  $\text{DMSO-}d_6$ ):  $\delta$  115.6 (C-3,5), 121.3 (C-1), 131.0 (C-2,6), 160.5 (C-4), 167.4 (COOH). ESI-MS  $m/z$ = 137 [M-H] $^-$ .

**Gallic acid (13):** Acolorless crystal (18 mg) (UV  $\lambda_{\max}$ =272 nm).  $^1\text{H}$ -NMR (500 MHz,  $\text{DMSO-}d_6$ ):  $\delta$  6.93 (2H, s). ESI-MS  $m/z$ = 169 [M-H] $^-$ .

**Brevifolin carboxylic acid (14):** Yellow powder (16 mg) (UV  $\lambda_{\max}$ = 277, 360 nm).  $^1\text{H}$ -NMR (400 MHz,  $\text{DMSO-}d_6$ ):  $\delta$  7.15(s, H-7), 4.36 (d,  $J$ =6.2Hz, H-2), 2.95 (d,  $J$ =17.4Hz, H-3a), 2.54 (dd,  $J$ =6.2, 17.4Hz, H-3b).  $^{13}\text{C}$ -NMR (100 MHz,  $\text{DMSO-}d_6$ ):  $\delta$  172.6(C-1), 42.3(C-2), 37.3(C-3), 195.1(C-4), 148.5(C-4a), 115.6(C-4b), 160.9(C-6), 112.7 (C-6a), 108.1(C-7), 143.1(C-8), 140.9(C-9), 146.6(C-10), 140.1(C-10a). ESI-MS  $m/z$ =291 [M-H] $^-$ .

## Spectral Data of New Compound

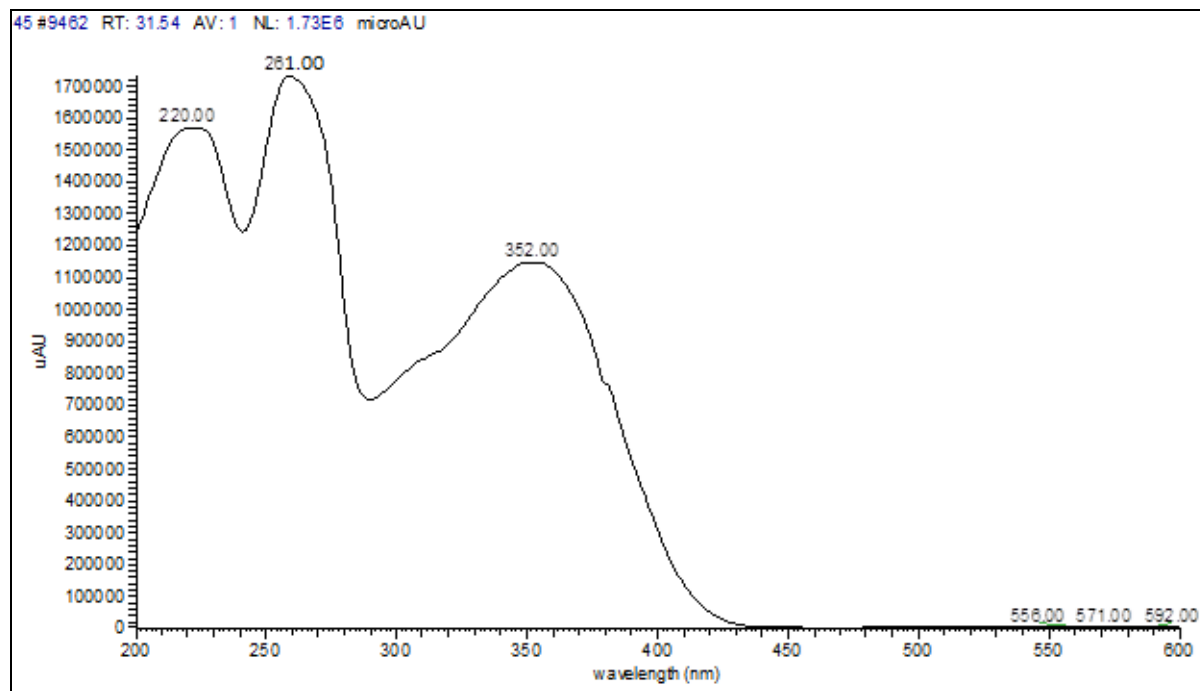

Fig. S1: UV spectrum of gossypetin-3-*O*- $\beta$ -D-robinobioside [rhamnosyl (1 $\rightarrow$ 6) galactoside]

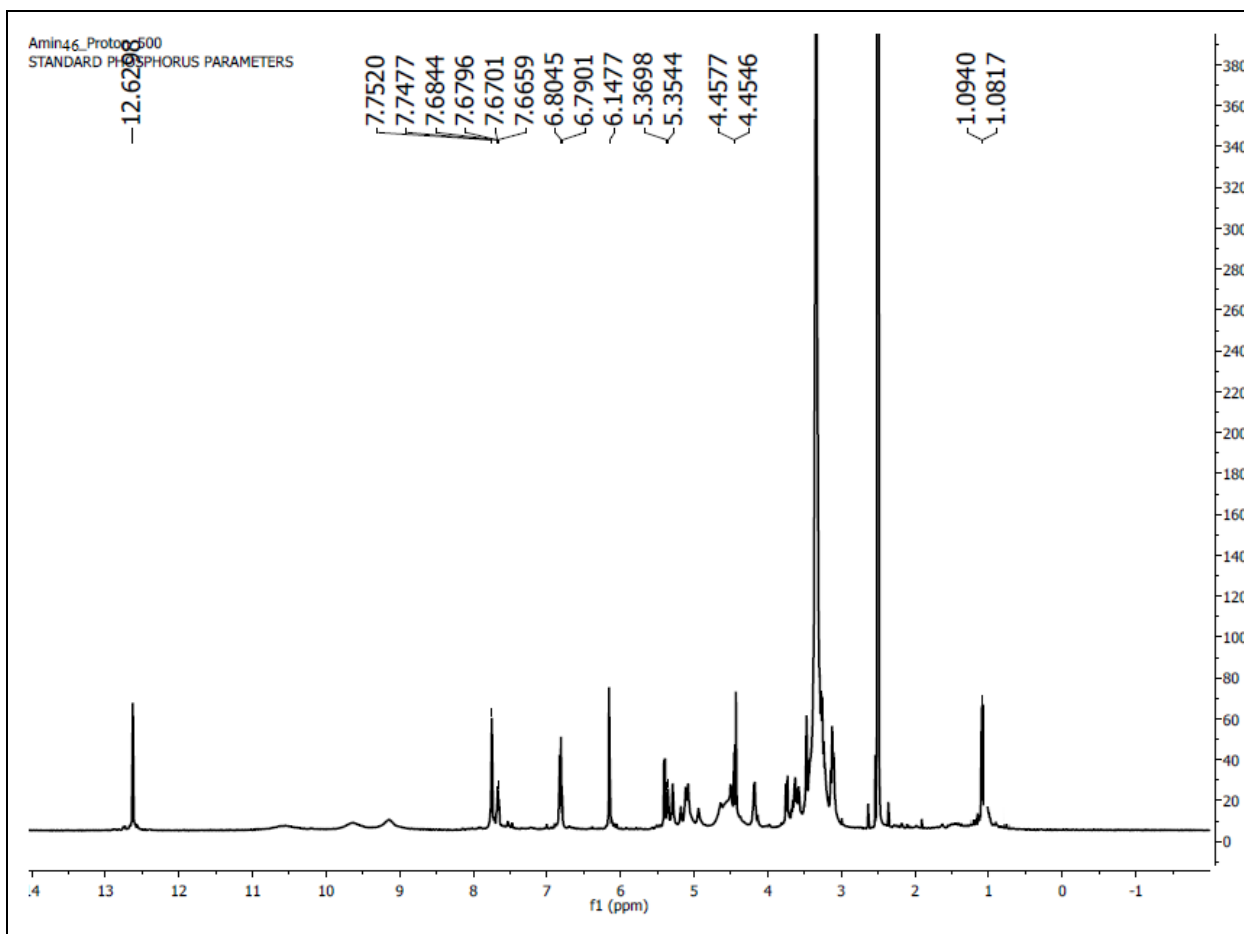

**Fig. S2:**  $^1\text{H-NMR}$  spectrum of gossypetin-3- $O$ - $\beta$ -D-robinobioside [rhamnosyl (1 $\rightarrow$ 6) galactoside]

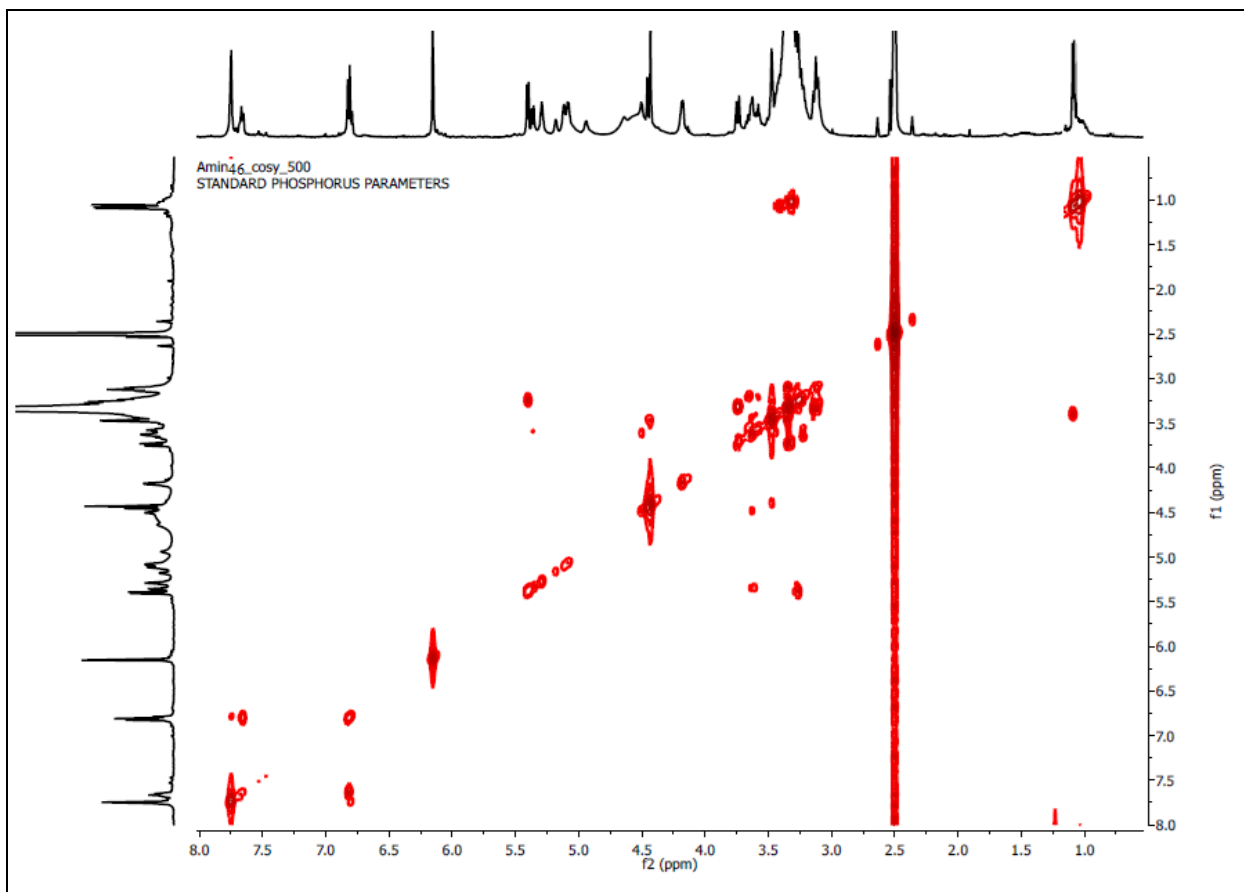

**Fig. S3:** HH-COSY NMR spectrum of gossypetin-3-*O*- $\beta$ -D-robinobioside [rhamnosyl (1 $\rightarrow$ 6) galactoside]

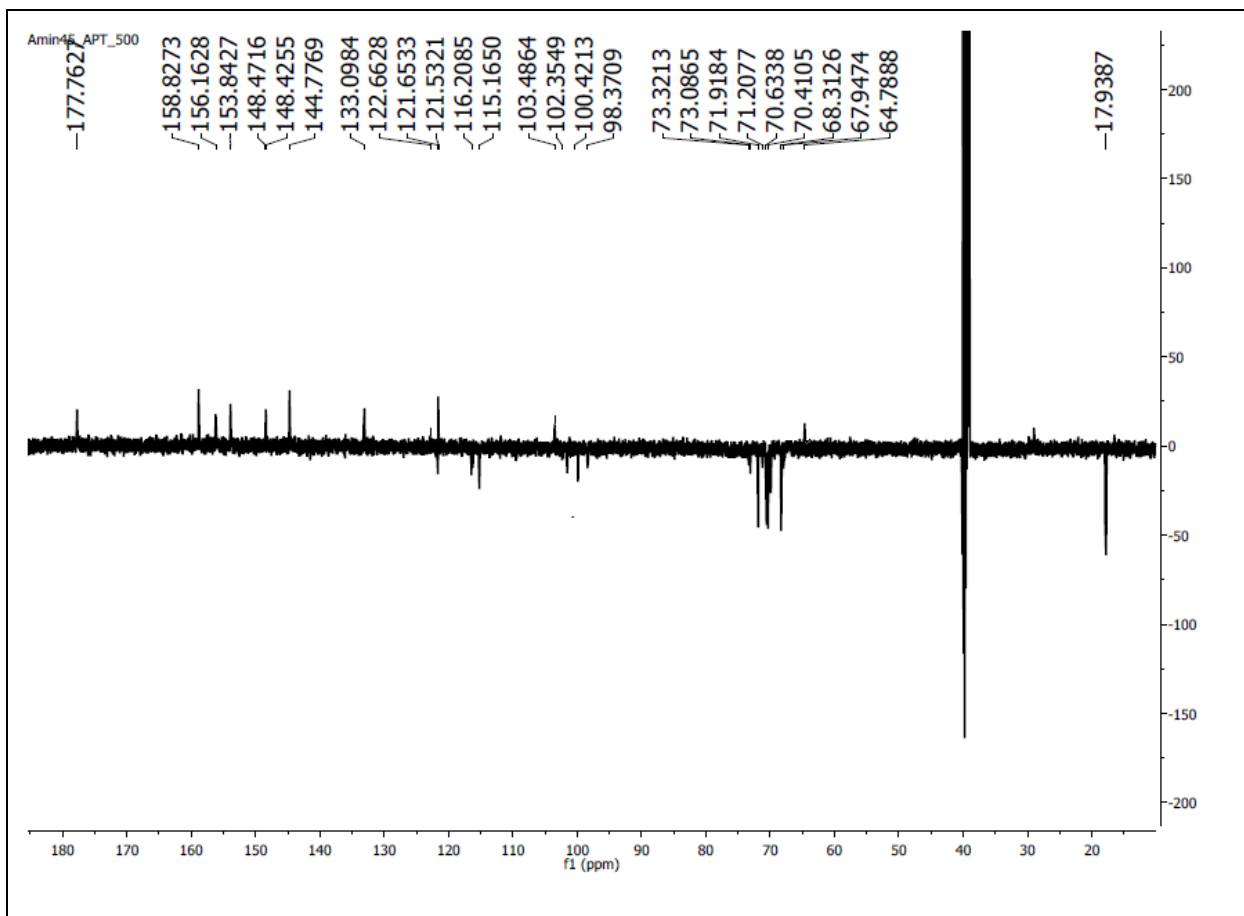

Fig. S4: APT-NMR spectrum of gossypetin-3-O- $\beta$ -D-robinobioside [rhamnosyl (1 $\rightarrow$ 6) galactoside]



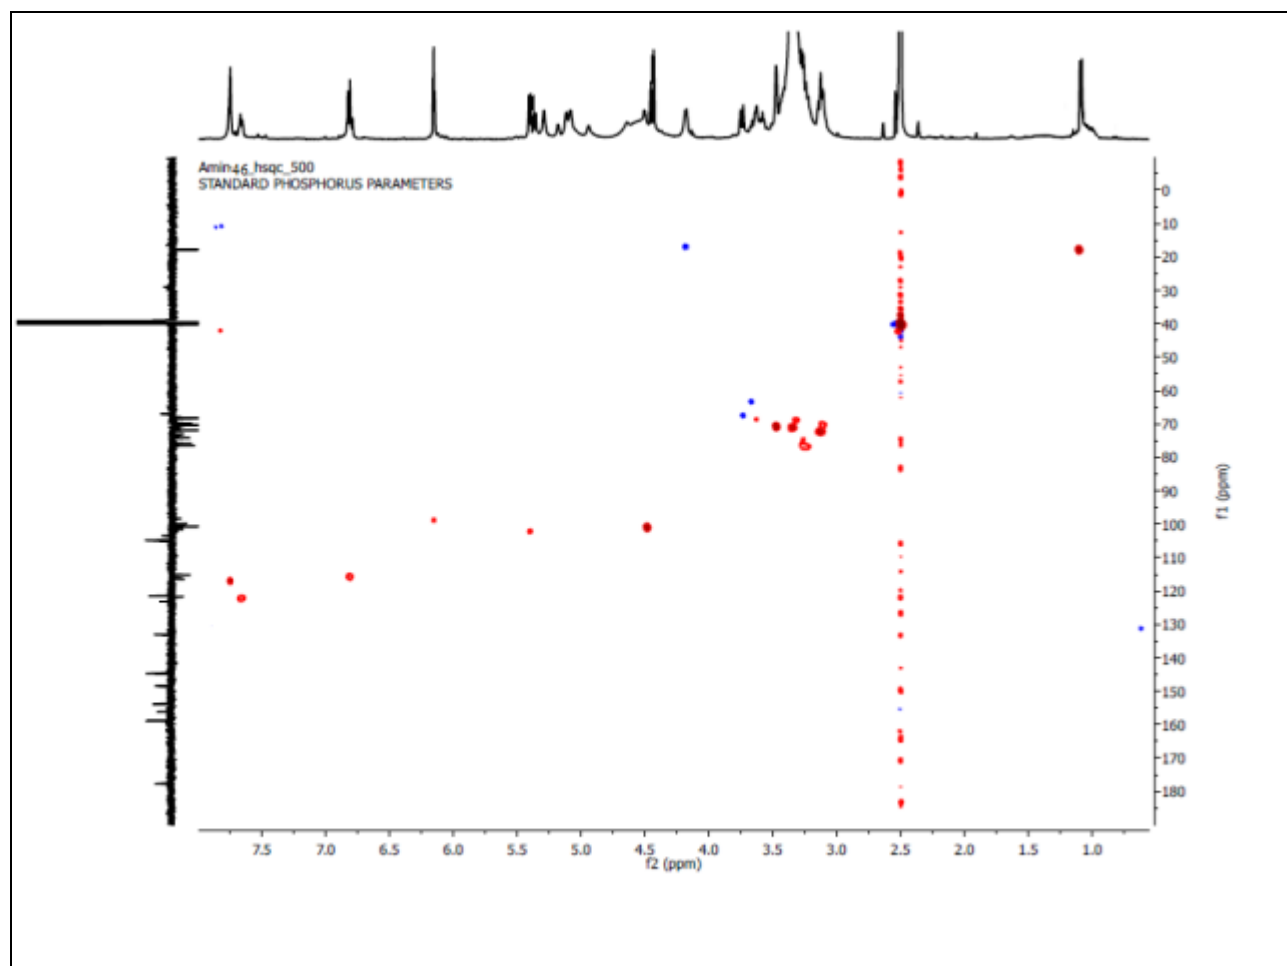

Fig. S5: HSQC-NMR spectrum of gossypetin-3-O- $\beta$ -D-robinobioside [rhamnosyl (1 $\rightarrow$ 6) galactoside]

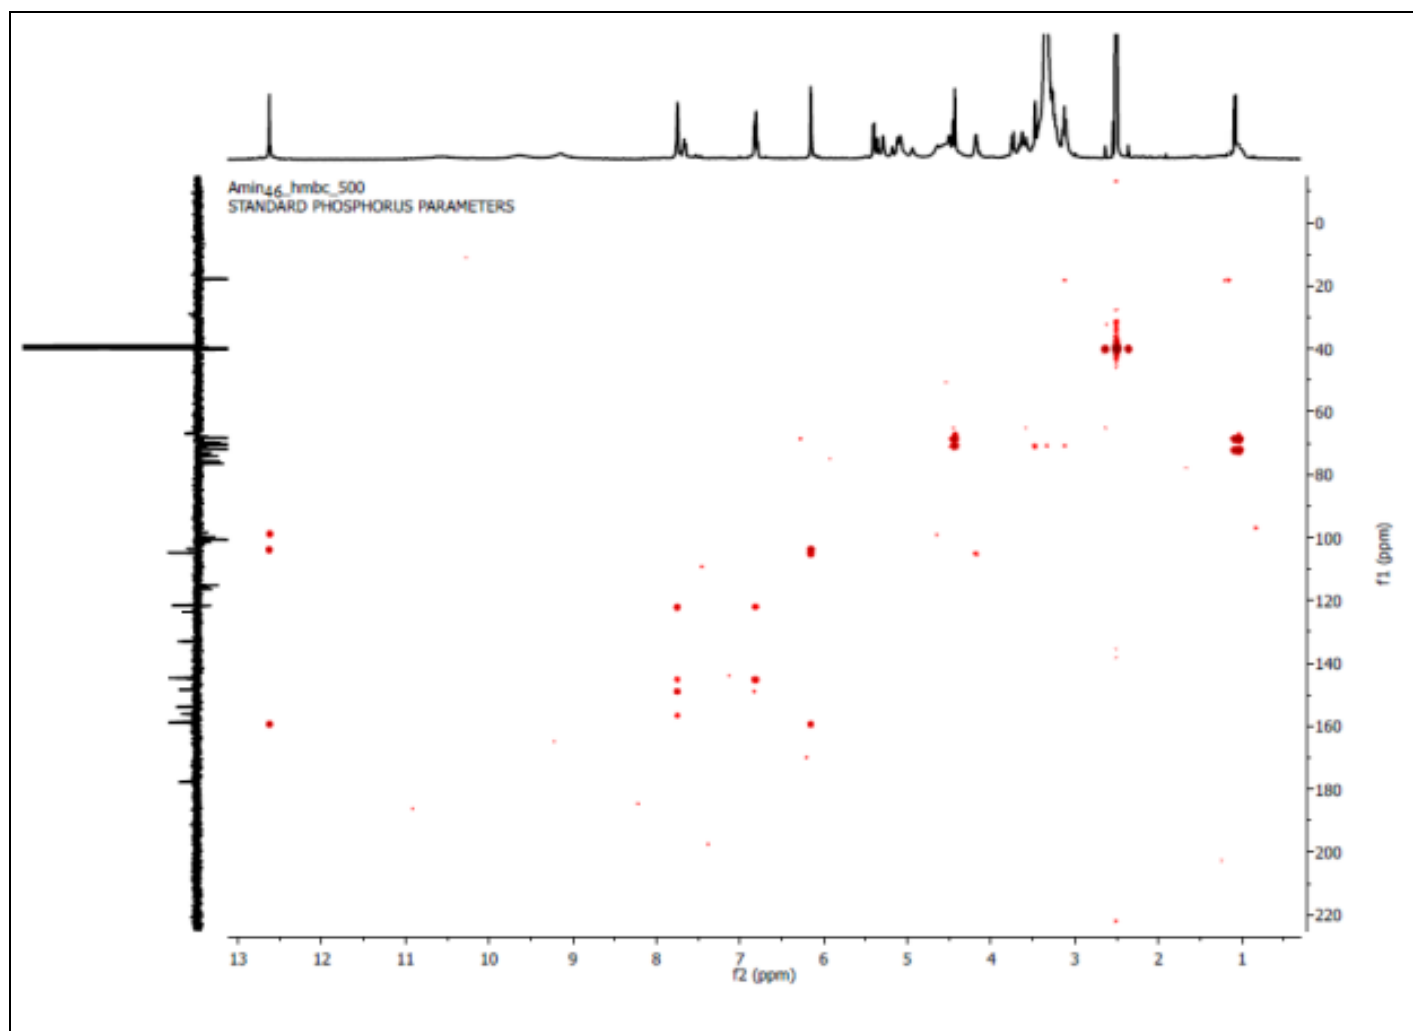

Fig. S6: HMBC-NMR spectrum of gossypetin-3-O- $\beta$ -D-robinobioside [rhamnosyl (1 $\rightarrow$ 6) galactoside]

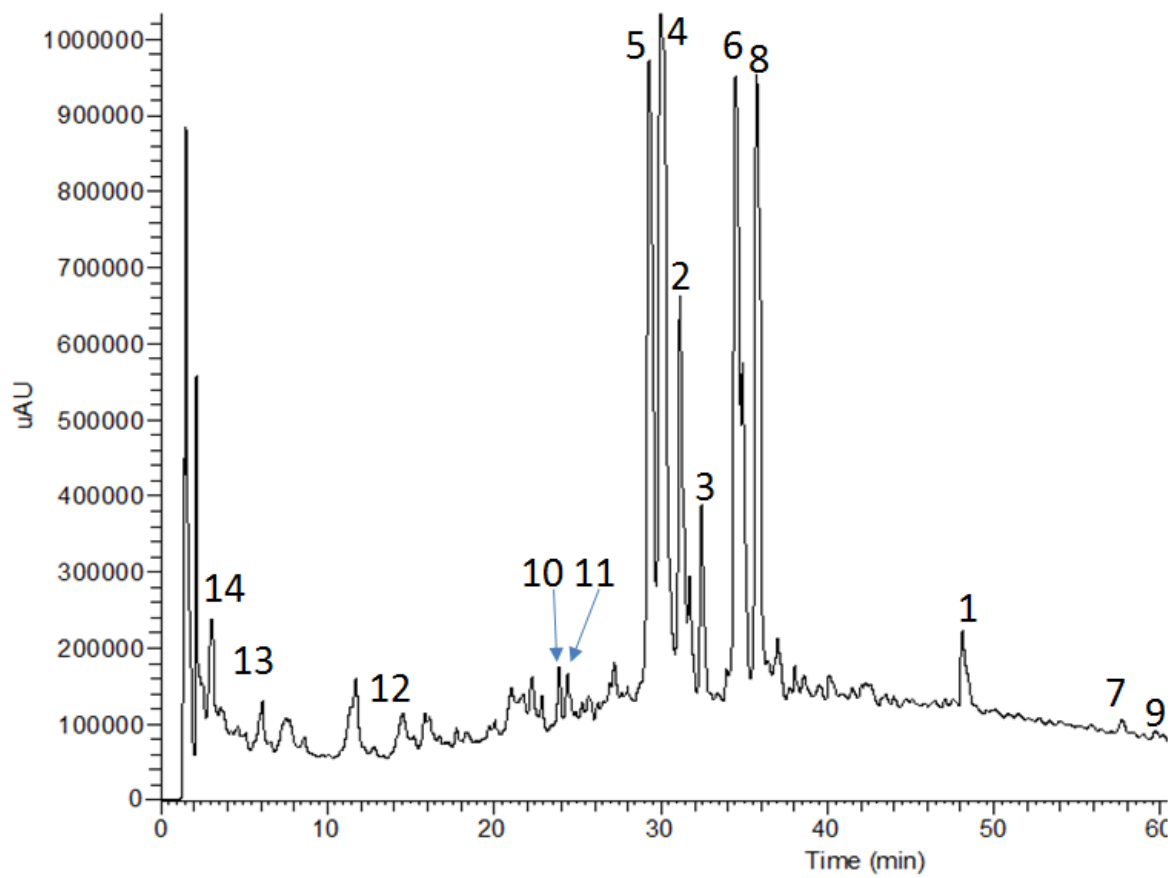

**Fig. S7:** HPLC-PDA profile of the methanol extract of of *Caesalpinia gilliesii*
